# Supplementary material for: Artificial Intelligence and Forensic Genetics: Current Applications and Future Perspectives
Source: MDPI journal article supplement (doi:10.3390/app14052113), 2024-03-04
Supplement: s1 [file s1]

| Title                                                                                                                         | Year | Source title                                                             | DOI                           |
|-------------------------------------------------------------------------------------------------------------------------------|------|--------------------------------------------------------------------------|-------------------------------|
| A symmetry perceiving adaptive neural network and facial image recognition                                                    | 1998 | Forensic Science International                                           | 10.1016/S0379-0738(98)00137-6 |
| Kernel mixture survival models for identifying cancer subtypes, predicting patient's cancer types and survival probabilities. | 2004 | Genome informatics.<br>International Conference on<br>Genome Informatics |                               |
| The latent process decomposition of cDNA microarray data sets                                                                 | 2005 | IEEE/ACM Transactions on<br>Computational Biology and<br>Bioinformatics  | 10.1109/TCBB.2005.29          |
| Analyzing gene expression time-courses                                                                                        | 2005 | IEEE/ACM Transactions on<br>Computational Biology and<br>Bioinformatics  | 10.1109/TCBB.2005.31          |
| Mixture model analysis of DNA microarray images                                                                               | 2005 | IEEE Transactions on Medical<br>Imaging                                  | 10.1109/TMI.2005.848358       |
| Dental biometrics: Alignment and matching of dental radiographs                                                               | 2005 | IEEE Transactions on Pattern<br>Analysis and Machine<br>Intelligence     | 10.1109/TPAMI.2005.157        |
| Using weighted permutation scores to detect differential gene expression with microarray data                                 | 2005 | Journal of Bioinformatics and<br>Computational Biology                   | 10.1142/S021972000500134X     |
| Surveillance society: Openness is the best defence against intrusions into our private realms                                 | 2006 | EMBO Reports                                                             | 10.1038/sj.embor.7400735      |
| Ballistics projectile image analysis for firearm identification                                                               | 2006 | IEEE Transactions on Image<br>Processing                                 | 10.1109/TIP.2006.877530       |
| Machine-learning approaches for classifying haplogroup from Y chromosome STR data                                             | 2008 | PLoS Computational Biology                                               | 10.1371/journal.pcbi.1000093  |
| Blind camera fingerprinting and image clustering                                                                              | 2008 | IEEE Transactions on Pattern<br>Analysis and Machine<br>Intelligence     | 10.1109/TPAMI.2007.1183       |
| Modeling and visualizing uncertainty in gene expression clusters using dirichlet process mixtures                             | 2009 | IEEE/ACM Transactions on<br>Computational Biology and<br>Bioinformatics  | 10.1109/TCBB.2007.70269       |
| A greedy algorithm for gene selection based on SVM and correlation                                                            | 2010 | International Journal of<br>Bioinformatics Research and<br>Applications  | 10.1504/IJBRA.2010.034077     |

|                                                                                                                                                    |      |                                                                                     |                                  |
|----------------------------------------------------------------------------------------------------------------------------------------------------|------|-------------------------------------------------------------------------------------|----------------------------------|
| A GMM-IG framework for selecting genes as expression panel biomarkers                                                                              | 2010 | Artificial Intelligence in Medicine                                                 | 10.1016/j.artmed.2009.07.006     |
| Breakpoint analysis of balanced chromosome rearrangements by next-generation paired-end sequencing                                                 | 2010 | European Journal of Human Genetics                                                  | 10.1038/ejhg.2009.211            |
| Introducing knowledge into differential expression analysis                                                                                        | 2010 | Journal of Computational Biology                                                    | 10.1089/cmb.2010.0034            |
| PopAffiliator: Online calculator for individual affiliation to a major population group based on 17 autosomal short tandem repeat genotype profile | 2011 | International Journal of Legal Medicine                                             | 10.1007/s00414-010-0472-2        |
| Classifying black and white spruce pollen using layered machine learning                                                                           | 2012 | New Phytologist                                                                     | 10.1111/j.1469-8137.2012.04291.x |
| A coarse to fine minutiae-based latent palmprint matching                                                                                          | 2013 | IEEE Transactions on Pattern Analysis and Machine Intelligence                      | 10.1109/TPAMI.2013.39            |
| Identification of unique repeated patterns, location of mutation in DNA finger printing using artificial intelligence technique                    | 2014 | International Journal of Bioinformatics Research and Applications                   | 10.1504/IJBRA.2014.059516        |
| Research on palmprint identification method based on quantum algorithms                                                                            | 2014 | Scientific World Journal                                                            | 10.1155/2014/670328              |
| Local and global preserving semisupervised dimensionality reduction based on random subspace for cancer classification                             | 2014 | IEEE Journal of Biomedical and Health Informatics                                   | 10.1109/JBHI.2013.2281985        |
| Human Centric Recognition of 3D Ear Models                                                                                                         | 2016 | International Journal of Computational Intelligence Systems                         | 10.1080/18756891.2016.1150002    |
| Teaching artificial intelligence to read electropherograms                                                                                         | 2016 | Forensic Science International: Genetics                                            | 10.1016/j.fsigen.2016.07.013     |
| Biomechanical Studies on Patterns of Cranial Bone Fracture Using the Immature Porcine Model                                                        | 2017 | Journal of Biomechanical Engineering                                                | 10.1115/1.4034430                |
| Hierarchical information fusion for decision making in craniofacial superimposition                                                                | 2018 | Information Fusion                                                                  | 10.1016/j.inffus.2017.03.004     |
| Facial composite systems: review                                                                                                                   | 2018 | Artificial Intelligence Review                                                      | 10.1007/s10462-016-9519-1        |
| Modeling Skull-Face Anatomical/Morphological Correspondence for Craniofacial Superimposition-Based Identification                                  | 2018 | IEEE Transactions on Information Forensics and Security                             | 10.1109/TIFS.2018.2791434        |
| Forensic Odontology: Automatic Identification of Persons Comparing Antemortem and Postmortem Panoramic Radiographs Using Computer Vision           | 2018 | RoFo Fortschritte auf dem Gebiet der Rontgenstrahlen und der Bildgebenden Verfahren | 10.1055/a-0632-4744              |

|                                                                                                                                                        |      |                                                        |                                |
|--------------------------------------------------------------------------------------------------------------------------------------------------------|------|--------------------------------------------------------|--------------------------------|
| DNA methylation-based age prediction using massively parallel sequencing data and multiple machine learning models                                     | 2018 | Forensic Science International: Genetics               | 10.1016/j.fsigen.2018.09.003   |
| RNA splicing analysis in genomic medicine                                                                                                              | 2019 | International Journal of Biochemistry and Cell Biology | 10.1016/j.biocel.2018.12.009   |
| The probability of predicting personality traits by the way user types on touch screen                                                                 | 2019 | Innovations in Systems and Software Engineering        | 10.1007/s11334-018-0317-6      |
| Identification of biometrics based on a classical mathematical methods in forensic medicine                                                            | 2019 | Indian Journal of Forensic Medicine and Toxicology     | 10.5958/0973-9130.2019.00207.X |
| Automated detection and removal of capillary electrophoresis artifacts due to spectral overlap                                                         | 2019 | Electrophoresis                                        | 10.1002/elps.201900060         |
| Artificially intelligent scoring and classification engine for forensic identification                                                                 | 2020 | Forensic Science International: Genetics               | 10.1016/j.fsigen.2019.102162   |
| Feasibility of use of medical dual energy scanner for forensic detection and characterization of explosives, a phantom study                           | 2020 | International Journal of Legal Medicine                | 10.1007/s00414-020-02315-y     |
| Validation studies of the ParaDNA® Intelligence System with artificial evidence items                                                                  | 2021 | Forensic Sciences Research                             | 10.1080/20961790.2019.1665159  |
| An association between fingerprint patterns with blood group and lifestyle based diseases: a review                                                    | 2021 | Artificial Intelligence Review                         | 10.1007/s10462-020-09891-w     |
| From Fingers to Faces: Visual Semiotics and Digital Forensics                                                                                          | 2021 | International Journal for the Semiotics of Law         | 10.1007/s11196-020-09766-x     |
| Artificial intelligence system for automatic deciduous tooth detection and numbering in panoramic radiographs                                          | 2021 | Dentomaxillofacial Radiology                           | 10.1259/dmfr.20200172          |
| Automatic landmark annotation in 3D surface scans of skulls: Methodological proposal and reliability study                                             | 2021 | Computer Methods and Programs in Biomedicine           | 10.1016/j.cmpb.2021.106380     |
| Prognosis of sexual dimorphism with unfused hyoid bone: Artificial intelligence informed decision making with discriminant analysis                    | 2021 | Science and Justice                                    | 10.1016/j.scijus.2021.10.002   |
| Validation of a neural network approach for STR typing to replace human reading                                                                        | 2021 | Forensic Science International: Genetics               | 10.1016/j.fsigen.2021.102591   |
| Identification of diatom taxonomy by a combination of region-based full convolutional network, online hard example mining, and shape priors of diatoms | 2021 | International Journal of Legal Medicine                | 10.1007/s00414-021-02664-2     |
| Artificial neural network, predictor variables and sensitivity threshold for DNA methylation-based age prediction using blood samples                  | 2021 | Scientific Reports                                     | 10.1038/s41598-021-81556-2     |

|                                                                                                                                                                                         |      |                                                                   |                                |
|-----------------------------------------------------------------------------------------------------------------------------------------------------------------------------------------|------|-------------------------------------------------------------------|--------------------------------|
| Determine The Age Range Based On Machine-Learning Methods From Skeletal Angles Of The Face (Glabella And Maxilla Angle And Length And Width Of Piriformis) In A CT Scan                 | 2022 | International Journal of Medical Toxicology and Forensic Medicine | 10.32598/ijmtfm.v12i4.38605    |
| Computer-aided craniofacial superimposition validation study: the identification of the leaders and participants of the Polish-Lithuanian January Uprising (1863–1864)                  | 2022 | International Journal of Legal Medicine                           | 10.1007/s00414-022-02929-4     |
| Automatic detection of teeth and dental treatment patterns on dental panoramic radiographs using deep neural networks                                                                   | 2022 | Forensic Sciences Research                                        | 10.1080/20961790.2022.2034714  |
| Development of an artificial intelligence-based algorithm to classify images acquired with an intraoral scanner of individual molar teeth into three categories                         | 2022 | PLoS ONE                                                          | 10.1371/journal.pone.0261870   |
| Explainable artificial intelligence in forensics: Realistic explanations for number of contributor predictions of DNA profiles                                                          | 2022 | Forensic Science International: Genetics                          | 10.1016/j.fsigen.2021.102632   |
| High-throughput screening, next generation sequencing and machine learning: Advanced methods in enzyme engineering                                                                      | 2022 | Chemical Communications                                           | 10.1039/d1cc04635g             |
| A fully automated method of human identification based on dental panoramic radiographs using a convolutional neural network                                                             | 2022 | Dentomaxillofacial Radiology                                      | 10.1259/dmfr.20210383          |
| Twelfth ISABS Conference on Forensic and Anthropologic Genetics and Mayo Clinic Lectures in Individualized Medicine, Dubrovnik, Croatia, June 22-27, 2022                               | 2022 | Croatian Medical Journal                                          | 10.3325/cmj.2022.63.211        |
| FINGERPRINTS ANALYSIS USING AI ALGORITHM                                                                                                                                                | 2022 | International Journal of Medical Toxicology and Legal Medicine    | 10.5958/0974-4614.2022.00092.4 |
| Human Remains Identification Using Micro-CT, Chemometric and AI Methods in Forensic Experimental Reconstruction of Dental Patterns after Concentrated Sulphuric Acid Significant Impact | 2022 | Molecules                                                         | 10.3390/molecules27134035      |
| Interpretable Passive Multi-Modal Sensor Fusion for Human Identification and Activity Recognition                                                                                       | 2022 | Sensors                                                           | 10.3390/s22155787              |
| Deep learning-assisted Fe3O4 NPs for in-situ visual recognition of multi-dimensional information on latent fingerprints                                                                 | 2022 | Sensors and Actuators B: Chemical                                 | 10.1016/j.snb.2022.132020      |
| Criminal Behavior Identification Using Social Media Forensics                                                                                                                           | 2022 | Electronics (Switzerland)                                         | 10.3390/electronics11193162    |
| Texture-Based Neural Network Model for Biometric Dental Applications                                                                                                                    | 2022 | Journal of Personalized Medicine                                  | 10.3390/jpm12121954            |
| Diagnostic performance of convolutional neural networks for dental sexual dimorphism                                                                                                    | 2022 | Scientific Reports                                                | 10.1038/s41598-022-21294-1     |

|                                                                                                                                                                                                  |      |                                                                   |                                 |
|--------------------------------------------------------------------------------------------------------------------------------------------------------------------------------------------------|------|-------------------------------------------------------------------|---------------------------------|
| Evaluating artificial intelligence for comparative radiography                                                                                                                                   | 2023 | International Journal of Legal Medicine                           | 10.1007/s00414-023-03080-4      |
| Deep Neural Networks-Based Age Estimation of Cadavers Using CT Imaging of Vertebrae                                                                                                              | 2023 | International Journal of Environmental Research and Public Health | 10.3390/ijerph20064806          |
| Stature estimation by semi-automatic measurements of 3D CT images of the femur                                                                                                                   | 2023 | International Journal of Legal Medicine                           | 10.1007/s00414-022-02921-y      |
| Employing deep learning for sex estimation of adult individuals using 2D images of the humerus                                                                                                   | 2023 | Neural Computing and Applications                                 | 10.1007/s00521-022-07981-0      |
| Static Evaluation of a Midimew Connected Torus Network for Next Generation Supercomputers                                                                                                        | 2023 | Sustainability (Switzerland)                                      | 10.3390/su15086766              |
| DiatomNet v1.0: A novel approach for automatic diatom testing for drowning diagnosis in forensically biomedical application                                                                      | 2023 | Computer Methods and Programs in Biomedicine                      | 10.1016/j.cmpb.2023.107434      |
| Designer genes courtesy of artificial intelligence                                                                                                                                               | 2023 | Genes and Development                                             | 10.1101/gad.350783.123          |
| Artificial intelligence in timber forensics employing DNA barcode database                                                                                                                       | 2023 | 3 Biotech                                                         | 10.1007/s13205-023-03604-0      |
| Automatic sex estimation using deep convolutional neural network based on orthopantomogram images                                                                                                | 2023 | Forensic Science International                                    | 10.1016/j.forsciint.2023.111704 |
| Age-Net: An Advanced Hybrid Deep Learning Model for Age Estimation Using Orthopantomograph Images                                                                                                | 2023 | Traitement du Signal                                              | 10.18280/ts.400423              |
| Cascade of convolutional models for few-shot automatic cephalometric landmarks localization                                                                                                      | 2023 | Engineering Applications of Artificial Intelligence               | 10.1016/j.engappai.2023.106391  |
| A survey on deep learning-based image forgery detection                                                                                                                                          | 2023 | Pattern Recognition                                               | 10.1016/j.patcog.2023.109778    |
| Comprehensive evaluations of individual discrimination, kinship analysis, genetic relationship exploration and biogeographic origin prediction in Chinese Dongxiang group by a 60-plex DIP panel | 2023 | Hereditas                                                         | 10.1186/s41065-023-00271-2      |
| A comparative analysis of human and AI performance in forensic estimation of physical attributes                                                                                                 | 2023 | Scientific Reports                                                | 10.1038/s41598-023-31821-3      |
| A Machine-Learning-Based Approach to Prediction of Biogeographic Ancestry within Europe                                                                                                          | 2023 | Int J Mol Sci                                                     | doi:10.3390/ijms242015095       |
| Multi-omics integration strategy in the post-mortem interval of forensic science                                                                                                                 | 2024 | Talanta                                                           | 10.1016/j.talanta.2023.125249   |
| Applying artificial intelligence to determination of legal age of majority from radiographic                                                                                                     | 2024 | Morphologie                                                       | 10.1016/j.morpho.2023.100723    |
